# Supplementary material for: A carbon-black-embedded poly(dimethylsiloxane)-paper hybrid device for energy-efficient nucleic-acid amplification in point-of-care testing
Source: Royal Society of Chemistry journal article supplement (doi:10.1039/d2ay00554a), 2022-01-01
Supplement: d2ay00554a1.pdf [file d2ay00554a1.pdf]

## Supplementary material

### Carbon-black-embedded poly(dimethylsiloxane)-paper hybrid device for energy-efficient nucleic-acid amplification in point-of-care testing

Ye Lin Kim<sup>a</sup>, Donghyeok Kim<sup>b</sup>, Jihoon Park<sup>c</sup>, Minseok Kwak<sup>a, d</sup>, Joong Ho Shin<sup>a, b\*</sup>

<sup>a</sup>Industry 4.0 Convergence Bionics Engineering, Pukyong National University, Busan 48513, Republic of Korea

<sup>b</sup>Department of Biomedical Engineering, Pukyong National University, Busan 48513, Republic of Korea

<sup>c</sup>Seegene Inc, Seoul 05552, Republic of Korea

<sup>d</sup>Department of Chemistry, Pukyong National University, Busan 48513, Republic of Korea

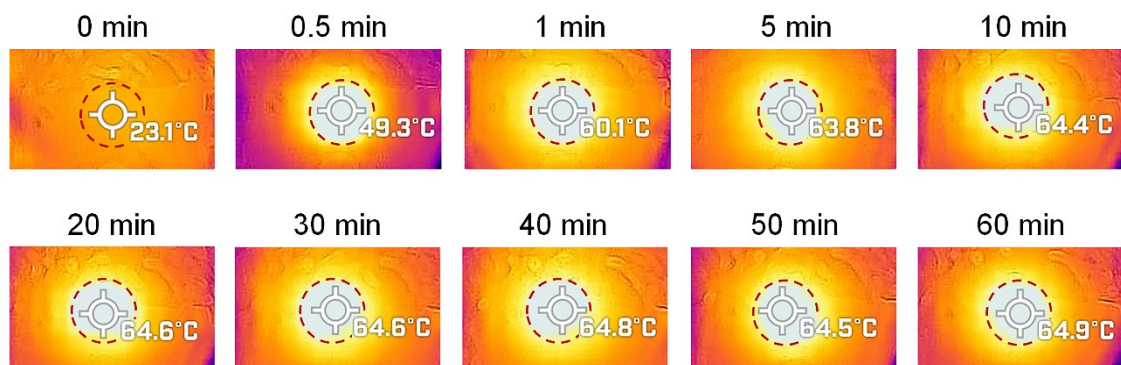

**Fig. S1** Infrared (IR) images of the paper-based device patterned with 1% carbon-black-PDMS irradiated by a 0.5 W 808-nm laser taken over 1 h. After the temperature was reached to 64 °C, temperature was maintained with minimal fluctuation.

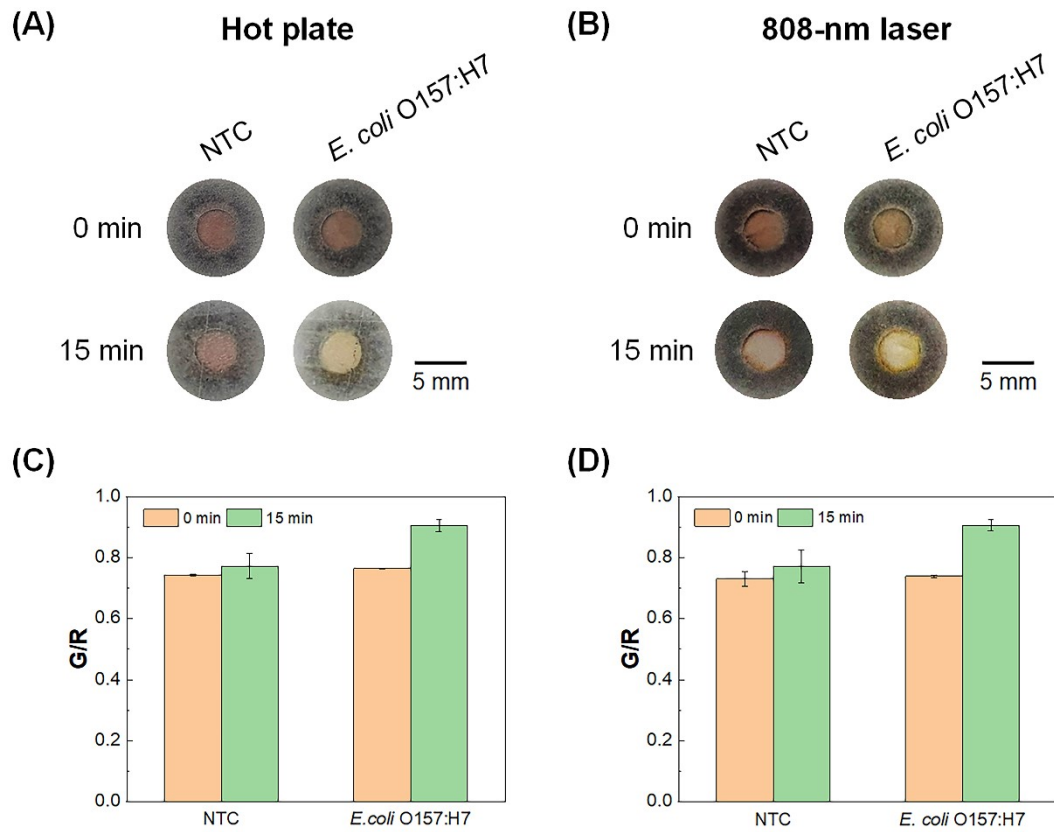

**Fig. S2** Comparison between the heating method. (A) and (C) shows the result of the LAMP conducted with hot plate. (B) and (D) shows the result of the LAMP conducted with the 808 nm laser. Regardless of the heating method, only the color of the paper-based device containing *E. coli* O157:H7 changed pink to yellow. The error bars represent the standard deviation of the mean.
