# Supplementary figures and images for: A carbon-black-embedded poly(dimethylsiloxane)-paper hybrid device for energy-efficient nucleic-acid amplification in point-of-care testing
Source: Royal Society of Chemistry journal article supplement (doi:10.1039/d2ay00554a), 2022-01-01

5 min

10 min

0 min  
23.1°C

0.5 min  
49.3°C

1 min  
60.1°C

5 min  
63.8°C

10 min  
64.4°C

20 min

30 min

40 min

50 min

60 min

20 min  
64.6°C

30 min  
64.6°C

40 min  
64.8°C

50 min  
64.5°C

60 min  
64.9°C

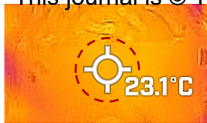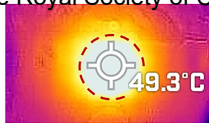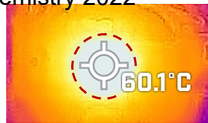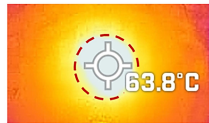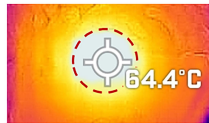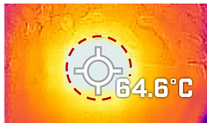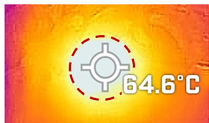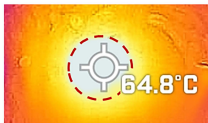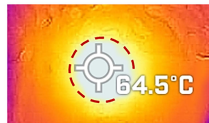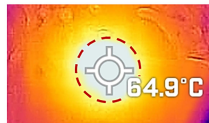

Supplement: d2ay00554a3.pdf [file d2ay00554a3.pdf]

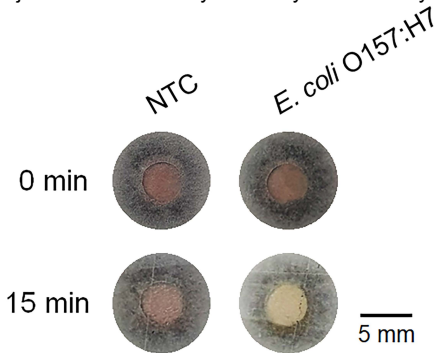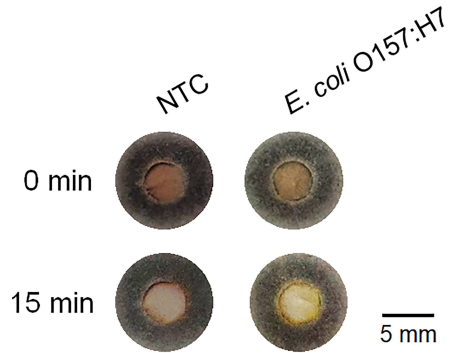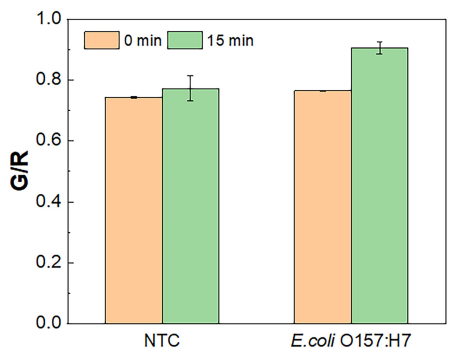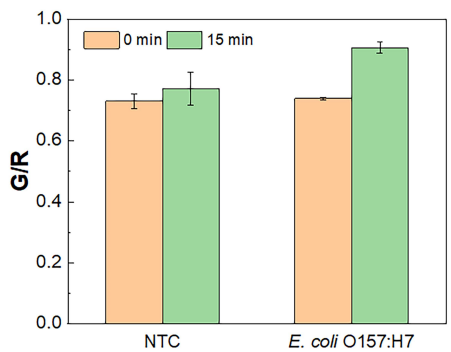

Supplement: d2ay00554a4.pdf [file d2ay00554a4.pdf]
